# Supplementary material for: Optimised ‘click’ synthesis of glycopolymers with mono/di- and trisaccharides
Source: Royal Society of Chemistry journal article supplement (doi:10.1039/c0py00260g), 2010-10-05
Supplement: c0py00260g.pdf [file c0py00260g.pdf]

Supporting Information

**Optimised ‘Click’ Synthesis of Glycopolymers with mono/di and trisaccharides.**

Nicola Vinson, Yanzi Gou, C Remzi Becer, David M. Haddleton and Matthew I. Gibson\*

Department of Chemistry

University of Warwick

Coventry

CV4 7AL, UK

\*Corresponding author

Email [m.i.gibson@warwick.ac.uk](mailto:m.i.gibson@warwick.ac.uk)

Phone: +44 247 652 4803

Fax: +44 247 652 4112

## Experimental

### Materials

Copper(I) bromide, 2-chloro-1,3-dimethylimidazolium chloride (DMC), *N,N*-diisopropylethylamine (DIPEA), sodium azide, D-cellobiose, L-fucose,  $\alpha$ -D-glucose, lactose, maltotriose, bathophenanthrolinedisulfonic acid disodium salt trihydrate (BPDS), concanavalin A and 2,2'-bipyridyl (bipyridine) were purchased from Sigma-Aldrich. Triethyl amine was purchased from Fisher Scientific. D-(+)-Galactose was purchased from Alfa-Aesar. All reagents were used as received unless otherwise specified. Copper(I) bromide was purified by the method of Keller and Wycoff.<sup>1</sup> Poly(propargyl methacrylate) was prepared according to previously published methods.<sup>2</sup> (SEC (DMF)  $M_n = 7400$ ,  $M_n/M_w = 1.29$  and satisfactory NMR data). The ligands *N*-ethyl-2-pyridylmethanimine<sup>3</sup> and tris[(1-benzyl-1*H*-1,2,3-triazol-4-yl)methyl]amine (TBTA)<sup>4</sup> were prepared as described previously. Phosphate buffered saline solution was prepared by dissolving a pre-formulated tablet from Sigma-Aldrich in 200 mL of ultra high quality water to give a final composition of 0.01 M phosphate, 0.0027 M potassium chloride and 0.137 sodium chloride, pH 7.4.

### Analytical and Physical Methods

<sup>1</sup>H and <sup>13</sup>C NMR spectra were recorded on Bruker DPX-300 and DPX-400 spectrometers using deuterated solvents obtained from Aldrich. Polymerisation kinetics were followed by <sup>1</sup>H NMR were recorded on a Bruker AV-400 spectrometer. Mass spectra were recorded on an Esquire2000 using electrospray ionisation (ESI) in positive mode. FTIR spectra were recorded on a Bruker Vector 22 FTIR spectrometer. SEC was conducted on a Varian 390-LC system in DMF (1 g/L LiBr) at 50°C, equipped with refractive index and viscometry detectors, 2 x PLgel 5  $\mu$ m mixed-D columns (300 x 7.5 mm), 1 x PLgel 5  $\mu$ m guard column (50 x 7.5 mm) and autosampler. Data was analysed using Cirrus 3.2 software. Molecular

weight was determined relative to narrow poly(methyl methacrylate) standards. For the turbidimetry studies absorbance was measured at 420 nm on a Perkin Elmer Lambda-35 UV/VIS spectrometer using 1 cm path length glass cuvettes.

## Procedures

### Click Reactions of $\beta$ -Glucose Azide (Ligand Variation)

A stock solution of  $\beta$ -glucose azide (90 mg, 0.44 mmol), alkyne-functionalised polymer (45 mg, 0.36 mmol) and triethylamine (12  $\mu$ l, 8.7 mg, 0.088 mmol) dissolved in  $d_6$ -DMSO (4.5 ml) was charged into a Schlenk tube, sealed with a rubber septum and deoxygenated by three freeze-pump-thaw cycles before being placed under nitrogen.

**Procedure 1:** Bipyridine (2 mg, 0.013 mmol) and copper(I) bromide (2 mg, 0.014 mmol) were added to a Young's tap NMR tube, followed by stock solution (0.6 ml). The reaction was quickly placed under vacuum and then nitrogen.

SEC  $M_n = 19700$ ,  $M_w = 28400$ ,  $M_n/M_w = 1.44$

**Procedure 2:** BPDS (9 mg, 0.015 mmol) and copper(I) bromide (2 mg, 0.014 mmol) were added to a Young's tap NMR tube, followed by stock solution (0.6 ml). The reaction was quickly placed under vacuum and then nitrogen.

SEC  $M_n = 15600$ ,  $M_w = 18600$ ,  $M_n/M_w = 1.19$

**Procedure 3:** Ethyl ligand (2  $\mu$ l, 2 mg, 0.015 mmol) and copper(I) bromide (2 mg, 0.014 mmol) were added to a Young's tap NMR tube, followed by stock solution (0.6 ml). The reaction was quickly placed under vacuum and then nitrogen.

SEC  $M_n = 16500$ ,  $M_w = 21400$ ,  $M_n/M_w = 1.30$

**Procedure 4:** TBTA (8 mg, 0.015 mmol) and copper(I) bromide (2 mg, 0.014 mmol) were added to a Young's tap NMR tube, followed by stock solution (0.6 ml). The reaction was quickly placed under vacuum and then nitrogen.

SEC  $M_n = 16200$ ,  $M_w = 19300$ ,  $M_n/M_w = 1.19$

All reactions were monitored by  $^1\text{H}$  NMR until completion. % Conversion was determined by monitoring the disappearance of the peak at 4.46 ppm.

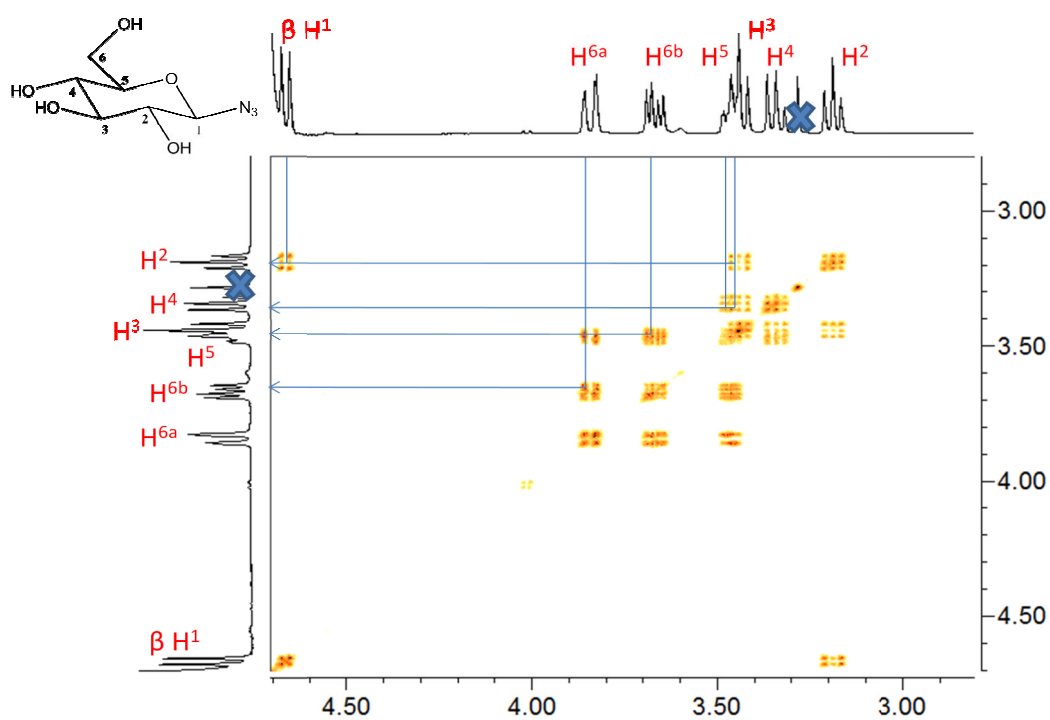

**Figure S1** COSY  $^1\text{H}$  NMR spectrum of glucose-azide in  $\text{D}_2\text{O}$

## Investigation into reaction between poly(alkyne) scaffold and glucose azide

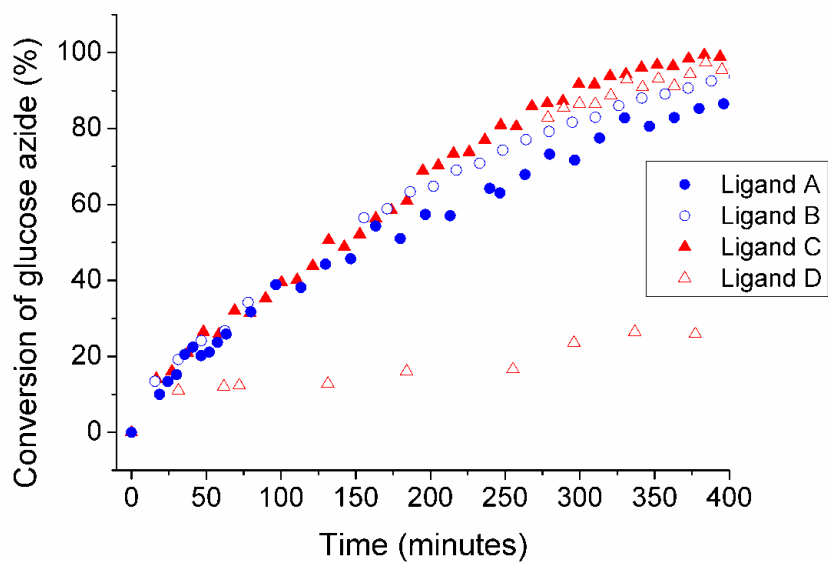

**Figure S2** Conversion of glucose azide as a function of time during click reaction with **P1**.

Conversion was determined by online  $^1\text{H}$  NMR.

## Representative infrared spectra showing conversion of alkyne and azide following ‘click’ reaction.

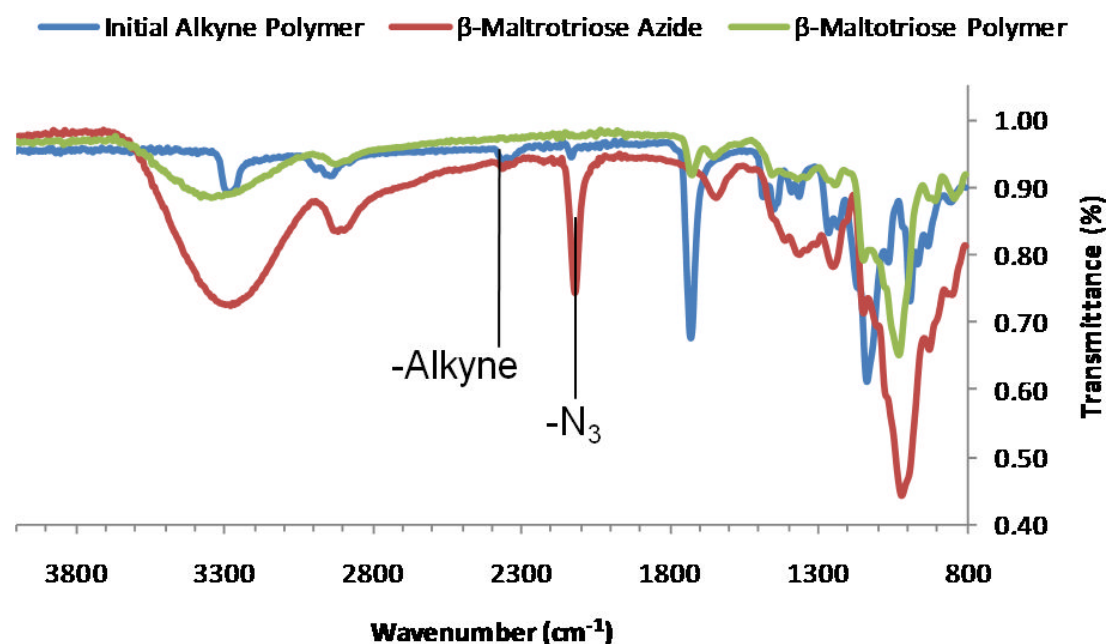

**Figure S3.** FTIR spectra of glycosyl azide and **P1** before and after ‘click’ reaction.

### References

1. R. N. Keller and H. D. Wycoff, *Inorg. Synth.*, 1946, 1 -4.
2. V. Ladmiral, G. Mantovani, G. J. Clarkson, S. Cauet, J. L. Irwin and D. M. Haddleton, *J. Am. Chem. Soc.*, 2006, **128**, 4823 - 4830.
3. D. M. Haddleton, M. C. Crossman, B. H. Dana, D. J. Duncalf, A. M. Heming, D. Kukulj, A. J. Shooter and *Macromolecules*, 1999, **32**, 2110 - 2119.
4. J. Geng, J. Lindqvist, G. Mantovani, G. Chen, C. T. Sayers, G. J. Clarkson and D. M. Haddleton, *QSAR Comb. Sci.*, 2007, **26**, 1220 - 1228.
